# Supplementary material for: Data-driven discovery of active phosphine ligand space for cross-coupling reactions
Source: Royal Society of Chemistry journal article supplement (doi:10.1039/d4sc02327g), 2024-01-01
Supplement: d4sc02327g2.pdf [file d4sc02327g2.pdf]

## Supplementary Information

# Data-Driven Discovery of Active Phosphine Ligand Space for Cross-Coupling Reaction

Sicong Ma,<sup>1,\*†</sup> Yanwei Cao,<sup>2†</sup> Yun-Fei Shi,<sup>3</sup> Cheng Shang,<sup>3</sup> Lin He<sup>2,\*</sup> and Zhi-Pan Liu<sup>1,3\*</sup>

<sup>1</sup>Key Laboratory of Synthetic and Self-Assembly Chemistry for Organic Functional Molecules, Shanghai Institute of Organic Chemistry, Chinese Academy of Sciences, Shanghai 200032, China

<sup>2</sup>State Key Laboratory for Oxo Synthesis and Selective Oxidation, Lanzhou Institute of Chemical Physics (LICP), Chinese Academy of Sciences, Lanzhou 730000, China

<sup>3</sup>Collaborative Innovation Center of Chemistry for Energy Materials (ICChem), Shanghai Key Laboratory of Molecular Catalysis and Innovative Materials, Key Laboratory of Computational Physical Science, Department of Chemistry, Fudan University, Shanghai 200433, China

† These authors contributed equally to this work.

**Corresponding Author:** scma@mail.sioc.ac.cn; helin@licp.cas.cn; zpliu@fudan.edu.cn

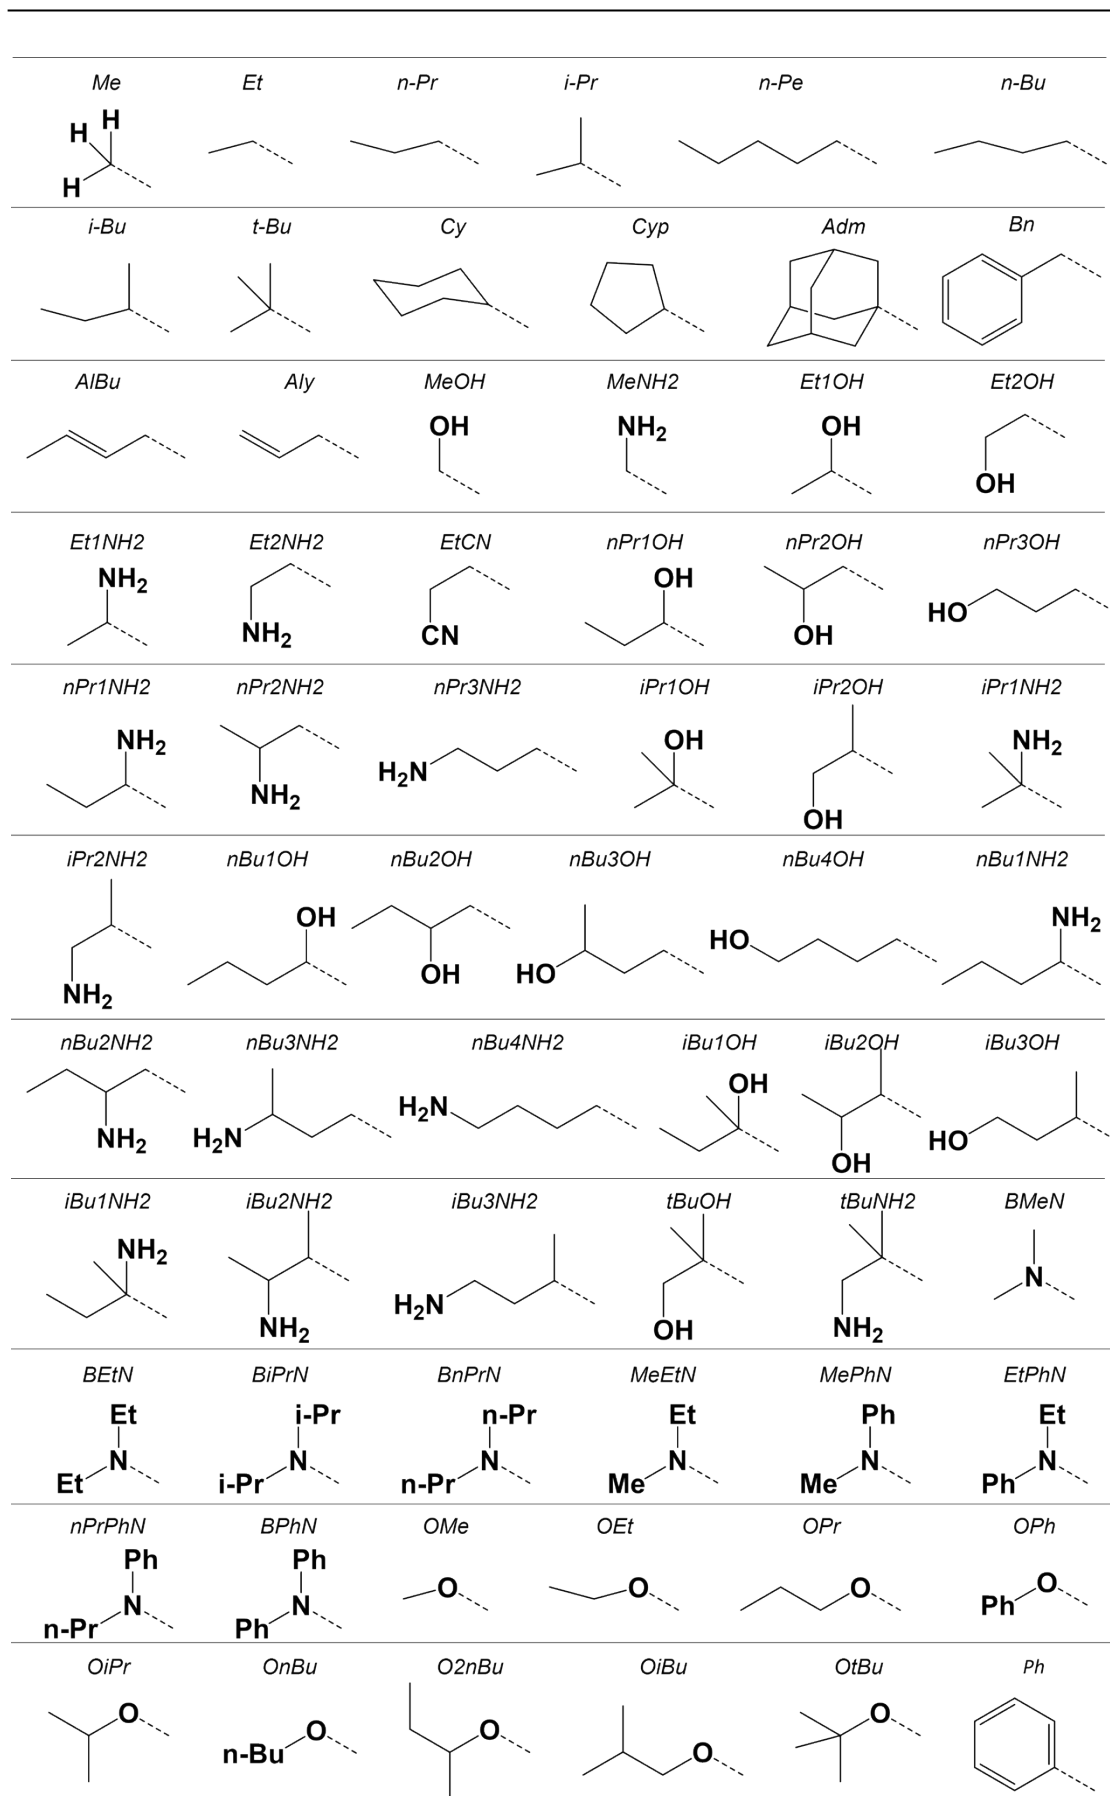

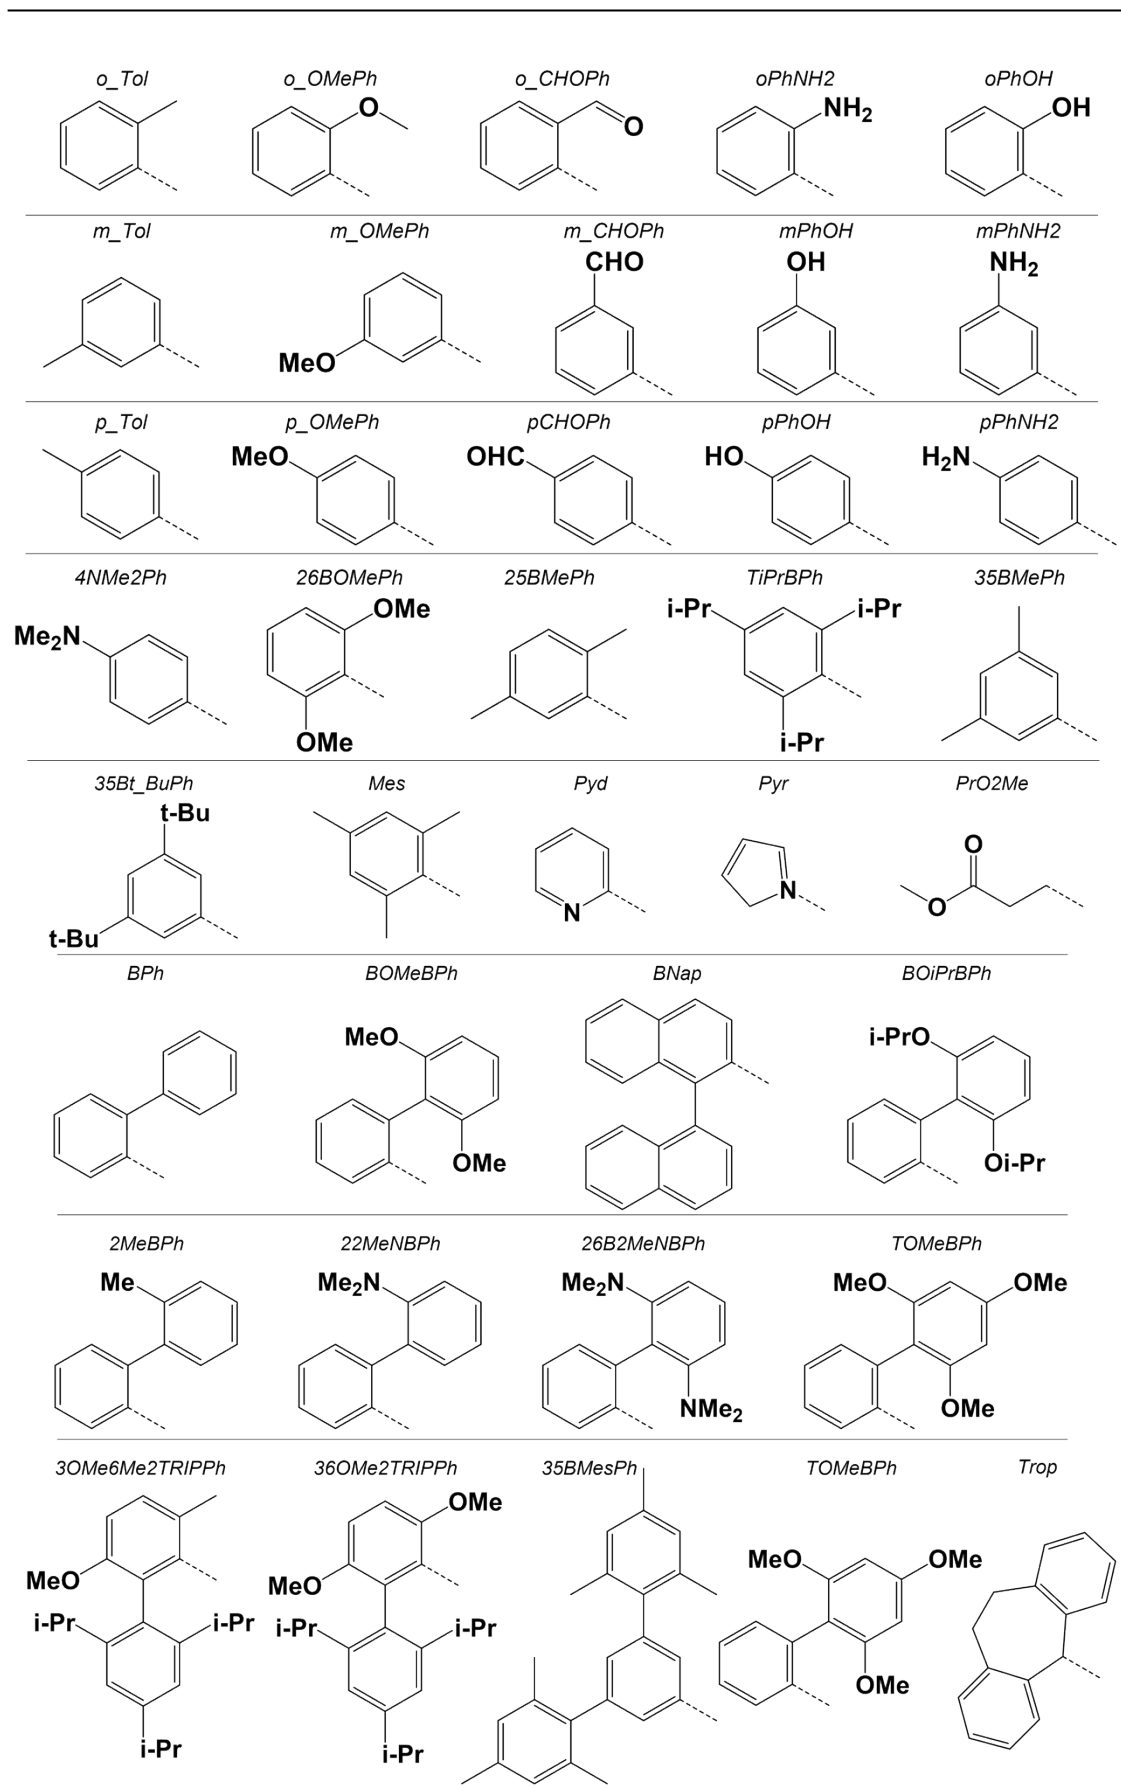

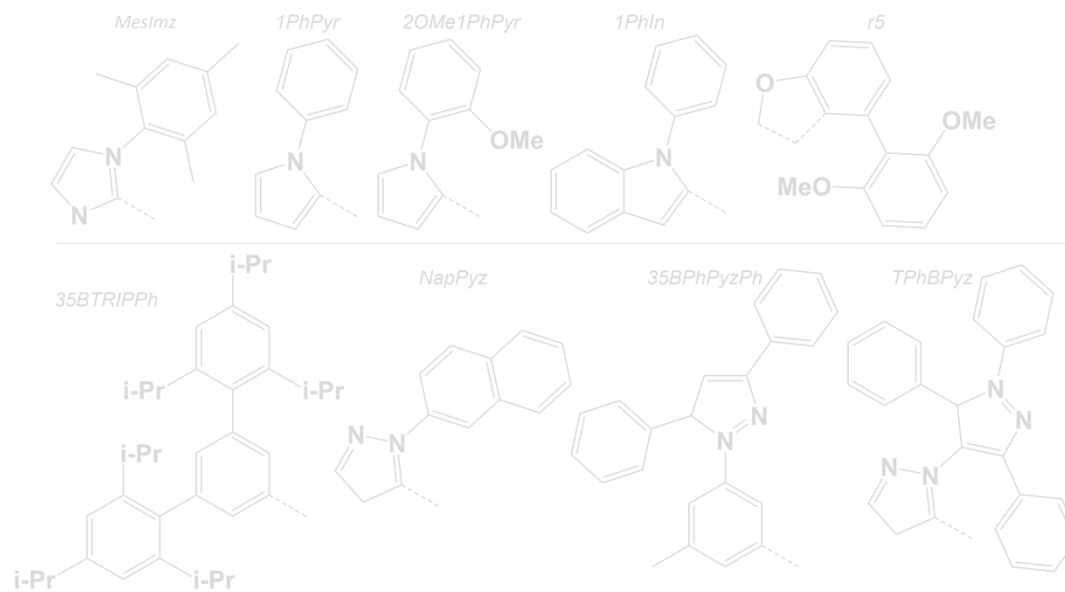

**Figure S1.** The substitution groups for P-ligand construction and their abbreviation name in MPCD.

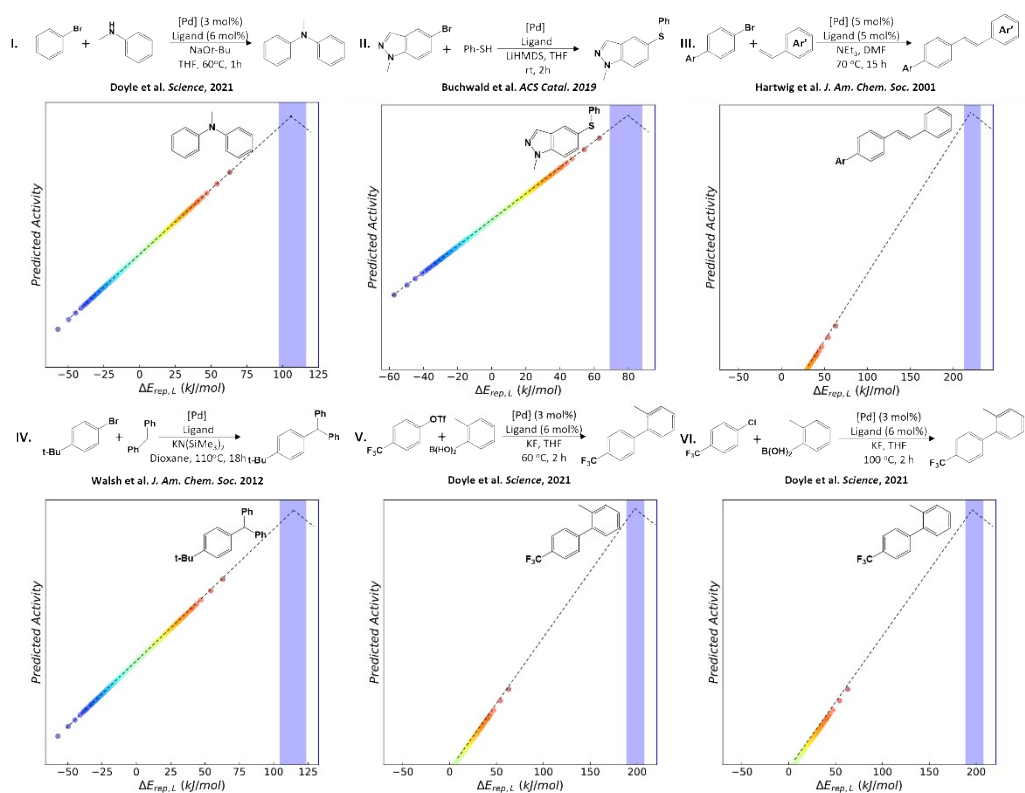

Figure S2. The MPCD-based volcano plot analysis for Pd catalyzed cross-coupling reactions with the coupling products as the key reaction species to match with P-ligand.

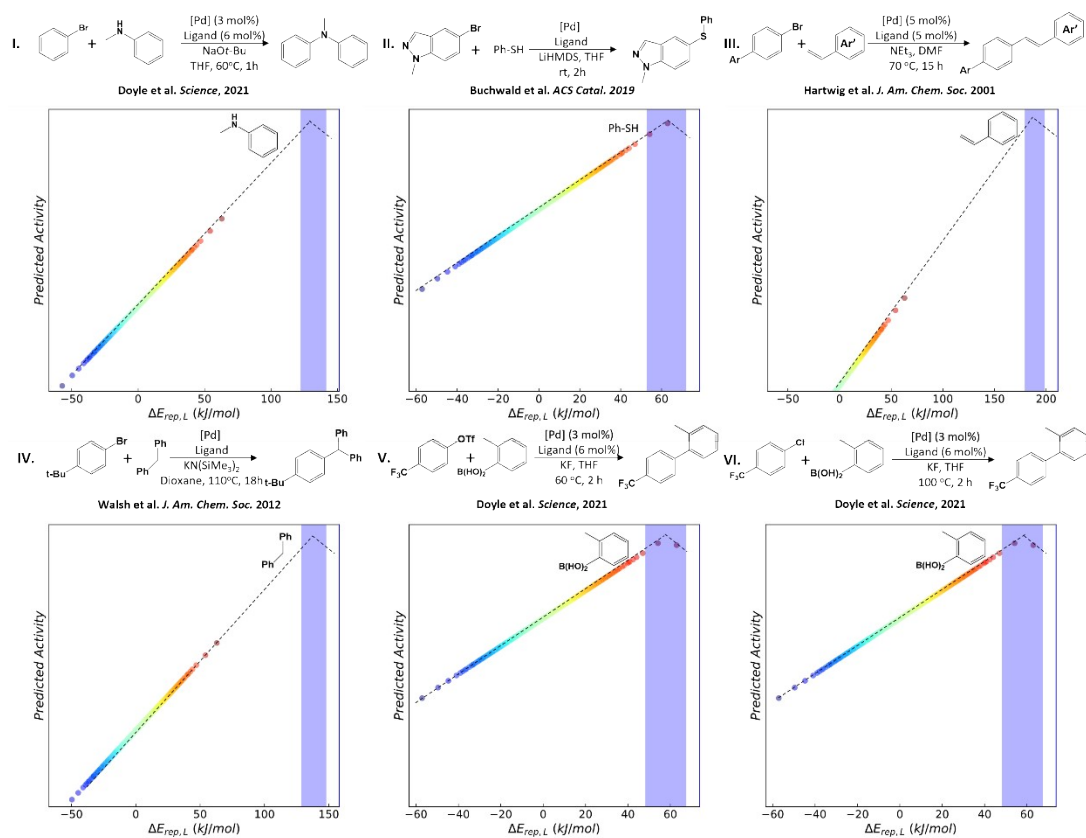

Figure S3. The MPCD-based volcano plot analysis for Pd catalyzed cross-coupling reactions with the coupling partners as the key reaction species to match with P-ligand.

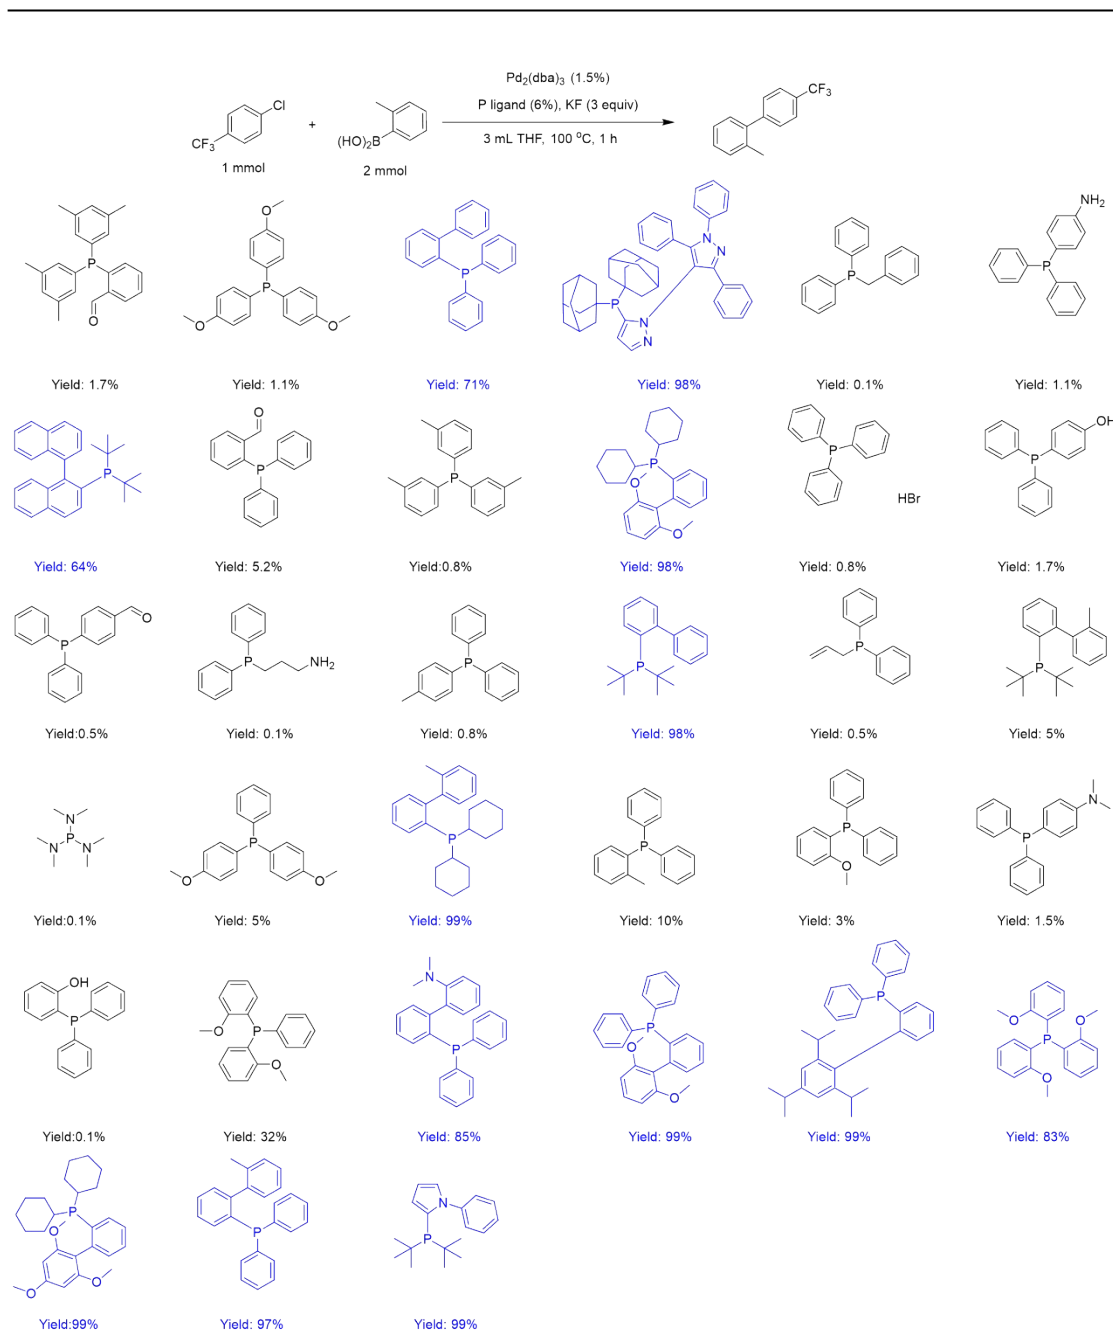

**Figure S4.** The product yield of reaction VI catalyzed by different P-ligands.

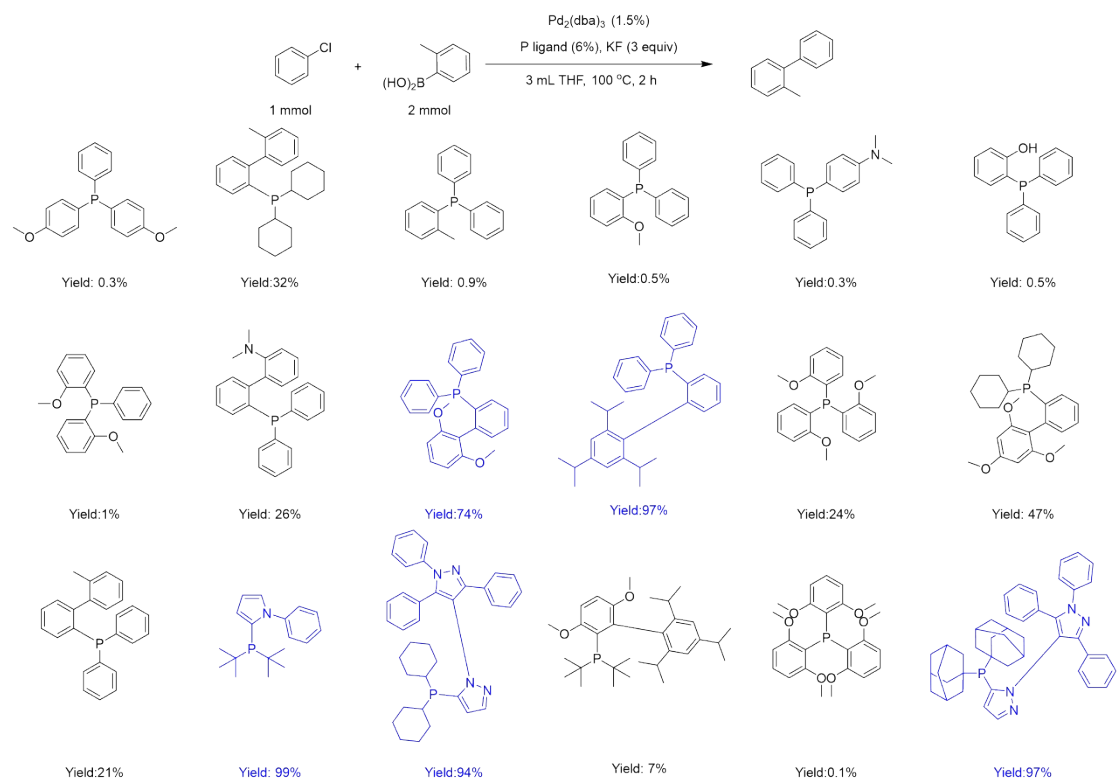

**Figure S5. The product yield of reaction VII catalyzed by different P-ligands.**



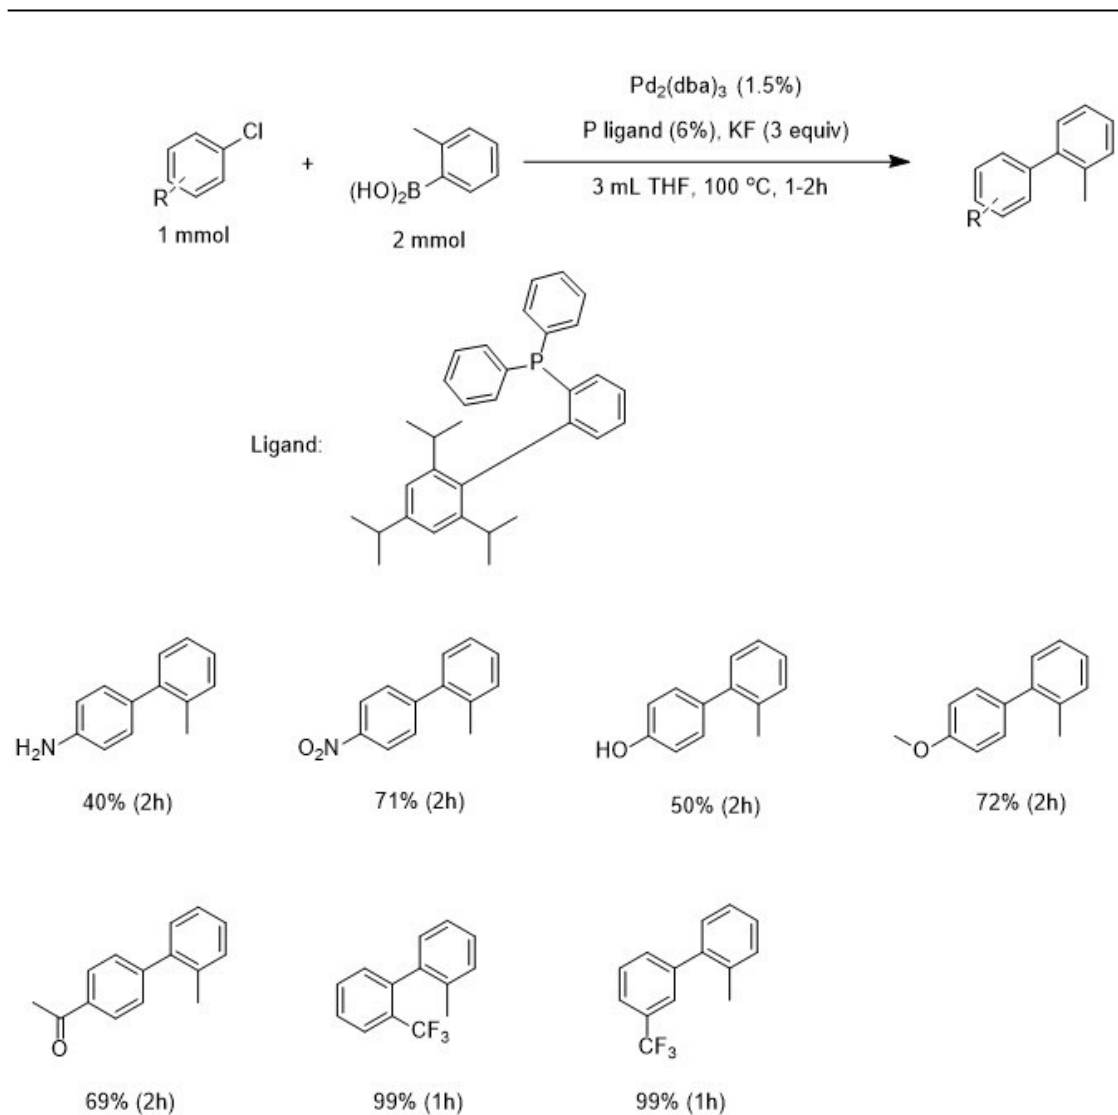

**Figure S6. Scope of the Pd-catalyzed Suzuki-Miyaura coupling reaction between different aryl chloride and *o*-tolylboronic acid.**

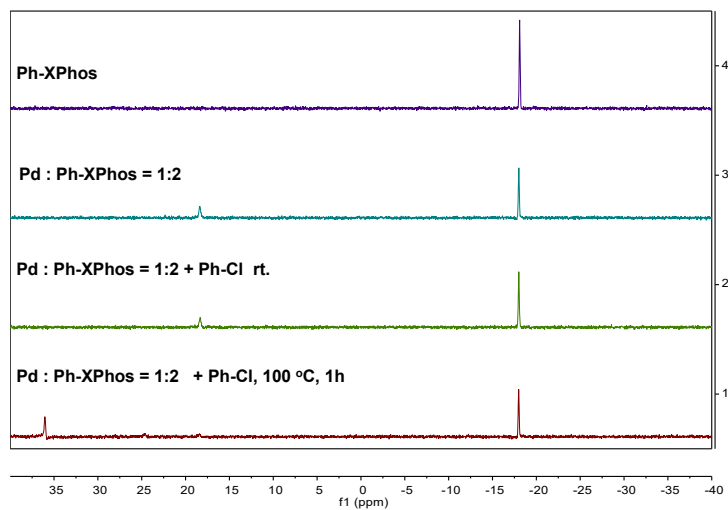

Figure S7. The  $^{31}\text{P}$  NMR spectrum of Ph-XPhos during the activation of PhCl.

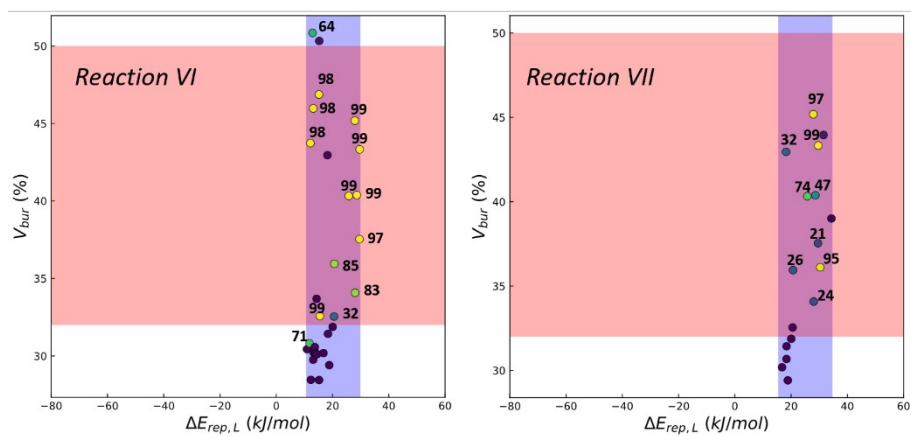

**Figure S8.** The  $V_{bur}$  Threshold and  $\Delta E_{rep,L}$  analysis of reaction activity for reaction VI and VII. The reaction activities larger than 20 % are labeled in the plot.

## Experimental standard curves

The standard curves were drawn through mixing biphenyls and dodecane as internal standard with various mass concentrations.  $m(i)$ : mass of biphenyls,  $m(s)$ : mass of internal standard (dodecane),  $A(i)$ : peak area of biphenyls,  $A(s)$ : peak area of internal standard (dodecane),  $k$ : correction factor. After correct the data, the yields of biphenyls in the reaction were calibrated.

$$\frac{m(i)}{m(s)} = k \frac{A(i)}{A(s)} \quad (1)$$

$$\text{Yield (\%)} = \frac{\text{Yields of biphenyls}}{\text{Theoretical yield}} \times 100\% \quad (2)$$

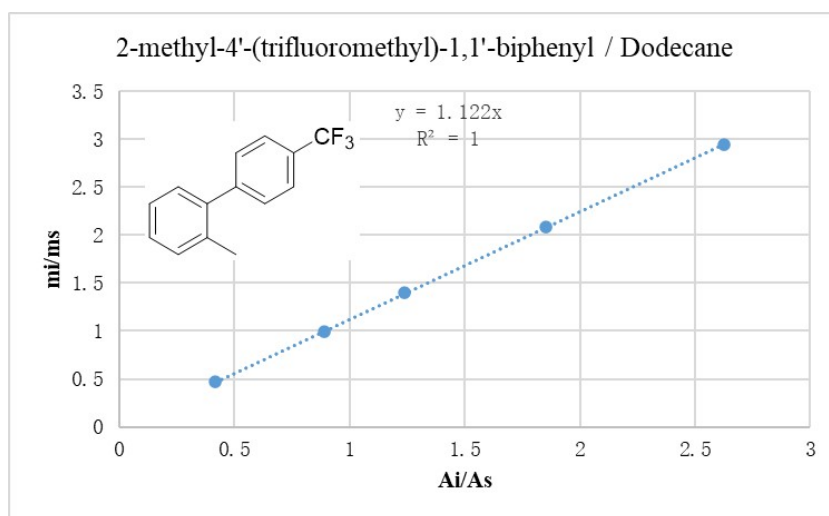

Figure S9. Standard curves for 2-methyl-4'-(trifluoromethyl)-1,1'-biphenyl and dodecane.

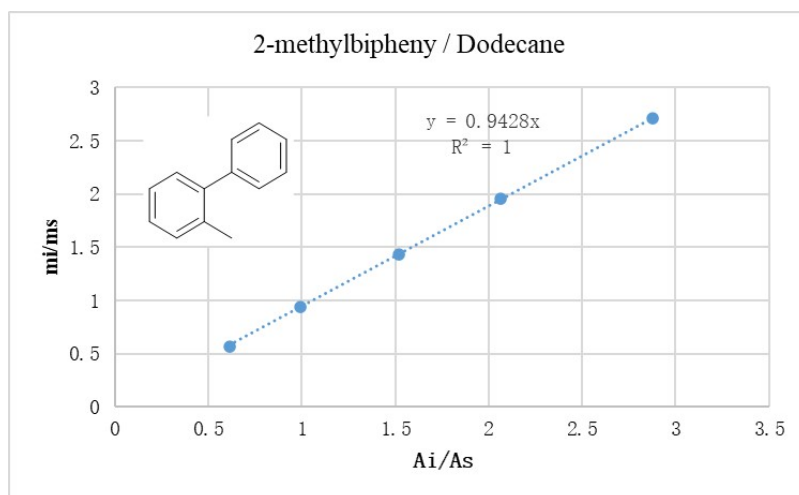

Figure S10. Standard curves for 2-methylbiphenyl and dodecane.

---

Table S1. The  $\Delta E_{rep}(R)$  values of common molecules.

| Molecule                         | $\Delta E_{rep}(R)$ (kJ/mol) |
|----------------------------------|------------------------------|
| CO                               | -26.1                        |
| PhI                              | -6.8                         |
| <i>p</i> - <i>t</i> -Bu-PhBr     | 2.9                          |
| <i>p</i> -Et-PhBr                | 3.9                          |
| PhBr                             | 4.8                          |
| <i>p</i> -CF <sub>3</sub> -PhOTf | 5.8                          |
| 2,6-bi-Me-PhBr                   | 5.8                          |
| 2,4-bi-Cl-Pyridine               | 9.6                          |
| <i>m</i> -CN-PhCl                | 17.4                         |
| <i>p</i> -CN-PhCl                | 18.3                         |
| <i>p</i> -COOEt-PhCl             | 19.3                         |
| <i>p</i> -CF <sub>3</sub> -PhCl  | 20.3                         |
| PhCl                             | 25.1                         |
| C <sub>2</sub> H <sub>2</sub>    | 28.0                         |
| C <sub>2</sub> H <sub>4</sub>    | 32.8                         |

**Table S2. The  $\Delta E_{rep}(L)$  values of commercially available P-ligands with Pd in MPCD.**

| name                       | G1           | G2        | G3        | $\Delta E_{rep}(L)$ (kJ/mol) |
|----------------------------|--------------|-----------|-----------|------------------------------|
| P_Cy_Cy_Cy                 | Cy           | Cy        | Cy        | -28.0                        |
| P_n_Bu_n_Bu_n_Bu           | n_Bu         | n_Bu      | n_Bu      | -23.2                        |
| P_Cy_o_Tol_o_Tol           | o_Tol        | Cy        | o_Tol     | -18.3                        |
| P_Cy_Cy_Et                 | Et           | Cy        | Cy        | -16.4                        |
| P_t_Bu_t_Bu_TiPrBPh        | t_Bu         | TiPrBPh   | t_Bu      | -10.6                        |
| P_Cy_Cy_Ph                 | Ph           | Cy        | Cy        | -8.7                         |
| P_Ph_OMe_OMe               | OMe          | Ph        | OMe       | -8.7                         |
| P_n_Bu_Adm_Adm             | n_Bu         | Adm       | Adm       | -8.7                         |
| P_Et_Et_Et                 | Et           | Et        | Et        | -7.7                         |
| P_Cy_Cy_p_Tol              | p_Tol        | Cy        | Cy        | -6.8                         |
| P_Cy_Cy_Bn                 | Bn           | Cy        | Cy        | -6.8                         |
| P_36OMe2TRIPPh_Cy_Cy       | 36OMe2TRIPPh | Cy        | Cy        | -5.8                         |
| P_Cy_4NMe2Ph_4NMe2Ph       | Cy           | 4NMe2Ph   | 4NMe2Ph   | -5.8                         |
| P_Ph_nPr3NH2_nPr3NH2       | nPr3NH2      | Ph        | nPr3NH2   | -3.9                         |
| P_t_Bu_t_Bu_n_Bu           | n_Bu         | t_Bu      | t_Bu      | -3.9                         |
| P_Cyp_Cyp_Cyp              | Cyp          | Cyp       | Cyp       | -3.9                         |
| P_t_Bu_t_Bu_t_Bu           | t_Bu         | t_Bu      | t_Bu      | -3.9                         |
| P_Adm_Adm_Adm              | Adm          | Adm       | Adm       | -2.9                         |
| P_iPr_iPr_iPr              | iPr          | iPr       | iPr       | -2.9                         |
| P_Cy_t_Bu_t_Bu             | t_Bu         | Cy        | t_Bu      | -1.9                         |
| P_Cy_Cy_o_Tol              | o_Tol        | Cy        | Cy        | -1.9                         |
| P_iPr_iPr_Ph               | Ph           | iPr       | iPr       | -1.9                         |
| P_MeOH_MeOH_MeOH           | MeOH         | MeOH      | MeOH      | 0.0                          |
| P_Et_Et_Ph                 | Et           | Ph        | Et        | 1.0                          |
| P_Me_t_Bu_t_Bu             | Me           | t_Bu      | t_Bu      | 1.0                          |
| P_Me_Me_Ph                 | Me           | Ph        | Me        | 1.0                          |
| P_Cy_Cy_4NMe2Ph            | 4NMe2Ph      | Cy        | Cy        | 1.9                          |
| P_Cy_Cy_25BMePh            | Cy           | 25BMePh   | Cy        | 1.9                          |
| P_Cy_BPh_Cy                | BPh          | Cy        | Cy        | 1.9                          |
| P_Ph_Ph_OEt                | OEt          | Ph        | Ph        | 1.9                          |
| P_Bn_Bn_Bn                 | Bn           | Bn        | Bn        | 2.9                          |
| P_Adm_Adm_oPhNH2           | Adm          | oPhNH2    | Adm       | 2.9                          |
| P_Adm_Bn_Adm               | Bn           | Adm       | Adm       | 2.9                          |
| P_Cy_Ph_Ph                 | Cy           | Ph        | Ph        | 2.9                          |
| P_Cy_35Bt_BuPh_35Bt_BuPh   | Cy           | 35Bt_BuPh | 35Bt_BuPh | 3.9                          |
| P_TiPrBPh_Cy_Cy            | TiPrBPh      | Cy        | Cy        | 3.9                          |
| P_Ph_m_Tol_m_Tol           | Ph           | m_Tol     | m_Tol     | 3.9                          |
| P_iPr_Ph_Ph                | iPr          | Ph        | Ph        | 4.8                          |
| P_Et_Ph_Ph                 | Et           | Ph        | Ph        | 4.8                          |
| P_25BMePh_25BMePh_25BMePh  | 25BMePh      | 25BMePh   | 25BMePh   | 4.8                          |
| P_Cy_Cy_BNap               | BNap         | Cy        | Cy        | 4.8                          |
| P_BNap_35Bt_BuPh_35Bt_BuPh | BNap         | 35Bt_BuPh | 35Bt_BuPh | 4.8                          |

|                                 |           |            |           |      |
|---------------------------------|-----------|------------|-----------|------|
| P_Ph_Ph_oPhNH2                  | oPhNH2    | Ph         | Ph        | 5.8  |
| P_Ph_mPhNH2_mPhNH2              | mPhNH2    | Ph         | mPhNH2    | 5.8  |
| P_Cy_Cy_1PhIn                   | 1PhIn     | Cy         | Cy        | 5.8  |
| P_Ph_t_Bu_t_Bu                  | Ph        | t_Bu       | t_Bu      | 5.8  |
| P_t_Bu_t_Bu_22MeNBPh            | 22MeNBPh  | t_Bu       | t_Bu      | 5.8  |
| P_Ph_OEt_OEt                    | Ph        | OEt        | OEt       | 5.8  |
| P_iPr_iPr_1PhPyr                | 1PhPyr    | iPr        | iPr       | 6.8  |
| P_t_Bu_t_Bu_TPhBPyz             | TPhBPyz   | t_Bu       | t_Bu      | 6.8  |
| P_Me_Ph_Ph                      | Me        | Ph         | Ph        | 6.8  |
| P_o_CHOPh_o_CHOPh_o_CHOPh       | o_CHOPh   | o_CHOPh    | o_CHOPh   | 6.8  |
| P_t_Bu_t_Bu_4NMe2Ph             | 4NMe2Ph   | t_Bu       | t_Bu      | 6.8  |
| P_Ph_Ph_Et2NH2                  | Et2NH2    | Ph         | Ph        | 6.8  |
| P_pPhOH_pPhOH_pPhOH             | pPhOH     | pPhOH      | pPhOH     | 6.8  |
| P_35Bt_BuPh_35Bt_BuPh_35Bt_BuPh | 35Bt_BuPh | 35Bt_BuPh  | 35Bt_BuPh | 7.7  |
| P_pPhNH2_pPhNH2_pPhNH2          | pPhNH2    | pPhNH2     | pPhNH2    | 7.7  |
| P_o_Tol_o_Tol_o_Tol             | o_Tol     | o_Tol      | o_Tol     | 7.7  |
| P_p_Tol_p_Tol_o_CHOPh           | o_CHOPh   | p_Tol      | p_Tol     | 7.7  |
| P_Ph_Ph_OMe                     | OMe       | Ph         | Ph        | 8.7  |
| P_m_OMePh_m_OMePh_m_OMePh       | m_OMePh   | m_OMePh    | m_OMePh   | 8.7  |
| P_p_Tol_p_Tol_p_Tol             | p_Tol     | p_Tol      | p_Tol     | 8.7  |
| P_Ph_o_CHOPh_o_CHOPh            | o_CHOPh   | Ph         | o_CHOPh   | 8.7  |
| P_Ph_Ph_n_Pr                    | n_Pr      | Ph         | Ph        | 8.7  |
| P_4NMe2Ph_4NMe2Ph_4NMe2Ph       | 4NMe2Ph   | 4NMe2Ph    | 4NMe2Ph   | 9.6  |
| P_Cy_Cy_26B2MeNBPh              | Cy        | 26B2MeNBPh | Cy        | 9.6  |
| P_35BMePh_35BMePh_35BMePh       | 35BMePh   | 35BMePh    | 35BMePh   | 9.6  |
| P_Cy_Cy_Mes                     | Mes       | Cy         | Cy        | 9.6  |
| P_t_Bu_t_Bu_1PhIn               | 1PhIn     | t_Bu       | t_Bu      | 10.6 |
| P_Ph_Ph_t_Bu                    | t_Bu      | Ph         | Ph        | 10.6 |
| P_35BMePh_35BMePh_o_CHOPh       | o_CHOPh   | 35BMePh    | 35BMePh   | 10.6 |
| P_p_OMePh_p_OMePh_p_OMePh       | p_OMePh   | p_OMePh    | p_OMePh   | 10.6 |
| P_t_Bu_Adm_Adm                  | t_Bu      | Adm        | Adm       | 10.6 |
| P_Ph_BPh_Ph                     | BPh       | Ph         | Ph        | 11.6 |
| P_mPhOH_mPhOH_mPhOH             | mPhOH     | mPhOH      | mPhOH     | 11.6 |
| P_TPhBPyz_Adm_Adm               | TPhBPyz   | Adm        | Adm       | 12.5 |
| P_Ph_Ph_Bn                      | Bn        | Ph         | Ph        | 12.5 |
| P_Ph_Ph_mPhNH2                  | mPhNH2    | Ph         | Ph        | 12.5 |
| P_t_Bu_t_Bu_BNap                | BNap      | t_Bu       | t_Bu      | 12.5 |
| P_Ph_Ph_o_CHOPh                 | o_CHOPh   | Ph         | Ph        | 12.5 |
| P_m_Tol_m_Tol_m_Tol             | m_Tol     | m_Tol      | m_Tol     | 13.5 |
| P_Cy_Cy_BOMeBPh                 | Cy        | BOMeBPh    | Cy        | 13.5 |
| P_Ph_Ph_Ph                      | Ph        | Ph         | Ph        | 13.5 |
| P_Ph_Ph_m_CHOPh                 | m_CHOPh   | Ph         | Ph        | 13.5 |
| P_Ph_p_Tol_p_Tol                | p_Tol     | Ph         | p_Tol     | 13.5 |
| P_Ph_Ph_pPhOH                   | pPhOH     | Ph         | Ph        | 13.5 |

---

|                              |              |          |          |      |
|------------------------------|--------------|----------|----------|------|
| P_Ph_Ph_pCHOPh               | Ph           | pCHOPh   | Ph       | 13.5 |
| P_Ph_Ph_nPr3NH2              | nPr3NH2      | Ph       | Ph       | 14.5 |
| P_o_OMePh_o_OMePh_o_CHOPh    | o_CHOPh      | o_OMePh  | o_OMePh  | 14.5 |
| P_Ph_Ph_p_Tol                | p_Tol        | Ph       | Ph       | 14.5 |
| P_t_Bu_t_Bu_BPh              | BPh          | t_Bu     | t_Bu     | 15.4 |
| P_Ph_Ph_Aly                  | Aly          | Ph       | Ph       | 15.4 |
| P_t_Bu_t_Bu_2MeBPh           | 2MeBPh       | t_Bu     | t_Bu     | 15.4 |
| P_BMeN_BMeN_BMeN             | BMeN         | BMeN     | BMeN     | 15.4 |
| P_Ph_p_OMePh_p_OMePh         | Ph           | p_OMePh  | p_OMePh  | 16.4 |
| P_Cy_Cy_2MeBPh               | 2MeBPh       | Cy       | Cy       | 18.3 |
| P_Ph_Ph_o_Tol                | o_Tol        | Ph       | Ph       | 18.3 |
| P_Ph_Ph_o_OMePh              | o_OMePh      | Ph       | Ph       | 18.3 |
| P_t_Bu_t_Bu_BOMeBPh          | t_Bu         | BOMeBPh  | t_Bu     | 18.3 |
| P_Ph_Ph_4NMe2Ph              | 4NMe2Ph      | Ph       | Ph       | 19.3 |
| P_Ph_Ph_oPhOH                | oPhOH        | Ph       | Ph       | 20.3 |
| P_Ph_o_OMePh_o_OMePh         | Ph           | o_OMePh  | o_OMePh  | 20.3 |
| P_22MeNBPh_Ph_Ph             | 22MeNBPh     | Ph       | Ph       | 20.3 |
| P_Mes_Mes_Cyp                | Mes          | Cyp      | Mes      | 24.1 |
| P_Ph_Ph_BOMeBPh              | Ph           | BOMeBPh  | Ph       | 26.1 |
| P_Ph_Ph_TiPrBPh              | TiPrBPh      | Ph       | Ph       | 28.0 |
| P_o_OMePh_o_OMePh_o_OMePh    | o_OMePh      | o_OMePh  | o_OMePh  | 28.0 |
| P_TOMeBPh_Cy_Cy              | TOMeBPh      | Cy       | Cy       | 28.9 |
| P_Ph_Ph_2MeBPh               | Ph           | 2MeBPh   | Ph       | 29.9 |
| P_t_Bu_t_Bu_1PhPyr           | 1PhPyr       | t_Bu     | t_Bu     | 29.9 |
| P_Cy_Cy_TPhBPyz              | TPhBPyz      | Cy       | Cy       | 29.9 |
| P_t_Bu_t_Bu_36OMe2TRIPPh     | 36OMe2TRIPPh | t_Bu     | t_Bu     | 31.8 |
| P_26BOMePh_26BOMePh_26BOMePh | 26BOMePh     | 26BOMePh | 26BOMePh | 34.7 |
| P_Mes_Mes_Mes                | Mes          | Mes      | Mes      | 35.7 |

---



**Table S3. The predicted P-ligands for *p*-CF<sub>3</sub>-PhCl activation via MPCD-based ALS and their reported catalytic performance in literature for Pd-catalyzed cross-coupling reaction.**

|    | name                      | G1       | G2      | G3      | $\Delta E_{rep}(L)$<br>(kJ/mol) | Vbur<br>(%) | Price<br>(CNY/g) | Yield<br>(%) <sup>a</sup> |
|----|---------------------------|----------|---------|---------|---------------------------------|-------------|------------------|---------------------------|
| 1  | P_p_OMePh_p_OMePh_p_OMePh | p_OMePh  | p_OMePh | p_OMePh | 10.6                            | 30.4        | 20               | 1                         |
| 2  | P_t_Bu_Adm_Adm            | t_Bu     | Adm     | Adm     | 10.6                            | 39.7        |                  |                           |
| 3  | P_Ph_BPh_Ph               | BPh      | Ph      | Ph      | 11.6                            | 30.8        | 21               | 71                        |
| 4  | P_mPhOH_mPhOH_mPhOH       | mPhOH    | mPhOH   | mPhOH   | 11.6                            | 29.8        |                  |                           |
| 5  | P_TPhBPyz_Adm_Adm         | TPhBPyz  | Adm     | Adm     | 12.5                            | 43.7        | 1871             | 98                        |
| 6  | P_Ph_Ph_Bn                | Bn       | Ph      | Ph      | 12.5                            | 28.5        | 40               | 0                         |
| 7  | P_Ph_Ph_mPhNH2            | mPhNH2   | Ph      | Ph      | 12.5                            | 30.6        |                  |                           |
| 8  | P_t_Bu_t_Bu_BNap          | BNap     | t_Bu    | t_Bu    | 12.5                            | 50.8        | 1097             | 64                        |
| 9  | P_m_Tol_m_Tol_m_Tol       | m_Tol    | m_Tol   | m_Tol   | 13.5                            | 29.8        | 10               | 1                         |
| 10 | P_Cy_Cy_BOMeBPh           | Cy       | BOMeBPh | Cy      | 13.5                            | 46.0        | 24               | 98                        |
| 11 | P_Ph_Ph_Ph                | Ph       | Ph      | Ph      | 13.5                            | 30.2        |                  |                           |
| 12 | P_Ph_Ph_Ph                | Ph       | Ph      | Ph      | 13.5                            | 30.2        | 1                | 0                         |
| 13 | P_Ph_p_Tol_p_Tol          | p_Tol    | Ph      | p_Tol   | 13.5                            | 30.0        |                  |                           |
| 14 | P_Ph_Ph_pPhOH             | pPhOH    | Ph      | Ph      | 13.5                            | 30.6        | 2203             | 2                         |
| 15 | P_Ph_Ph_pCHOPh            | Ph       | pCHOPh  | Ph      | 13.5                            | 30.2        | 1098             | 0                         |
| 16 | P_Ph_Ph_nPr3NH2           | nPr3NH2  | Ph      | Ph      | 14.5                            | 33.7        | 640              | 0                         |
| 17 | P_Ph_Ph_p_Tol             | p_Tol    | Ph      | Ph      | 14.5                            | 30.1        | 10               | 0                         |
| 18 | P_t_Bu_t_Bu_BPh           | BPh      | t_Bu    | t_Bu    | 15.4                            | 46.9        | 30               | 98                        |
| 19 | P_Ph_Ph_Aly               | Aly      | Ph      | Ph      | 15.4                            | 28.4        | 289              | 0                         |
| 20 | P_t_Bu_t_Bu_2MeBPh        | 2MeBPh   | t_Bu    | t_Bu    | 15.4                            | 50.3        | 33               | 5                         |
| 21 | P_BMeN_BMeN_BMeN          | BMeN     | BMeN    | BMeN    | 15.4                            | 32.6        | 10               | 0                         |
| 22 | P_Ph_p_OMePh_p_OMePh      | Ph       | p_OMePh | p_OMePh | 16.4                            | 30.2        | 103              | 0                         |
| 23 | P_Cy_Cy_2MeBPh            | 2MeBPh   | Cy      | Cy      | 18.3                            | 43.0        | 28               | 99                        |
| 24 | P_Ph_Ph_o_Tol             | o_Tol    | Ph      | Ph      | 18.3                            | 30.7        | 76               | 10                        |
| 25 | P_Ph_Ph_o_OMePh           | o_OMePh  | Ph      | Ph      | 18.3                            | 31.4        | 286              | 3                         |
| 26 | P_t_Bu_t_Bu_BOMeBPh       | t_Bu     | BOMeBPh | t_Bu    | 18.3                            | 51.4        |                  |                           |
| 27 | P_Ph_Ph_4NMe2Ph           | 4NMe2Ph  | Ph      | Ph      | 19.3                            | 29.4        | 20               | 2                         |
| 28 | P_Ph_Ph_oPhOH             | oPhOH    | Ph      | Ph      | 20.3                            | 31.9        | 359              | 0                         |
| 29 | P_Ph_o_OMePh_o_OMePh      | Ph       | o_OMePh | o_OMePh | 20.3                            | 32.5        | 123              | 32                        |
| 30 | P_22MeNBPh_Ph_Ph          | 22MeNBPh | Ph      | Ph      | 20.3                            | 35.9        | 35               | 85                        |
| 31 | P_Mes_Mes_Cyp             | Mes      | Cyp     | Mes     | 24.1                            | 41.4        |                  |                           |
| 32 | P_Ph_Ph_BOMeBPh           | Ph       | BOMeBPh | Ph      | 26.1                            | 40.3        | 46               | 99                        |
| 33 | P_Ph_Ph_TiPrBPh           | TiPrBPh  | Ph      | Ph      | 28.0                            | 45.2        | 37               | 99                        |
| 34 | P_o_OMePh_o_OMePh_o_OMePh | o_OMePh  | o_OMePh | o_OMePh | 28.0                            | 34.1        | 21               | 83                        |
| 35 | P_TOMeBPh_Cy_Cy           | TOMeBPh  | Cy      | Cy      | 28.9                            | 40.4        | 1711             | 99                        |
| 36 | P_Ph_Ph_2MeBPh            | Ph       | 2MeBPh  | Ph      | 29.9                            | 37.5        | 53               | 97                        |
| 37 | P_t_Bu_t_Bu_1PhPyr        | 1PhPyr   | t_Bu    | t_Bu    | 29.9                            | 43.3        | 1450             | 99                        |

<sup>a</sup> Reaction VI in manuscript.

**Table S4. TOF values for the representative catalytic system in the literature in the Suzuki coupling of *p*-CF<sub>3</sub>-PhCl/PhCl and *o*-tolylboronic acid.**

|                                     | P-ligand                                                                                                                    | Temp<br>(°C) | Time<br>(h) | Yield<br>(%) | TOF<br>(h <sup>-1</sup> ) | Price<br>(CNY/g) | Ref. |
|-------------------------------------|-----------------------------------------------------------------------------------------------------------------------------|--------------|-------------|--------------|---------------------------|------------------|------|
|                                     | 2-(2-methoxyphenyl)-1-(dicyclohexylphosphino)ferrocene                                                                      | 95           | 24          | 83           | 3.4                       |                  | 1    |
|                                     | P-cyclohexyl-4-hydroxy-2,2,6,6-tetramethylphosphorinane                                                                     | 110          | 16          | 85           | 5.3                       |                  | 2    |
| <b>PhCl</b>                         | (2-mesityl-1H-inden-3-yl)-dicyclohexylphosphine                                                                             | 100          | 8           | 79           | 6.6                       |                  | 3    |
|                                     | [PdCl <sub>2</sub> ((Ph <sub>2</sub> PCH <sub>2</sub> ) <sub>2</sub> NC <sub>6</sub> H <sub>4</sub> -2-(CF <sub>3</sub> ))] | 80           | 7           | 98           | 14                        |                  | 4    |
|                                     | <b>Our work</b>                                                                                                             | <b>100</b>   | <b>2</b>    | <b>97</b>    | <b>16</b>                 | <b>37</b>        |      |
|                                     | [Me <sub>2</sub> NCH <sub>2</sub> (Cl)C=C(CH <sub>2</sub> ) <sub>2</sub> OP(i-Pr) <sub>2</sub> -κNκCκP]PdCl                 | 130          | 27          | 85           | 6.3                       |                  | 5    |
| <b><i>p</i>-CF<sub>3</sub>-PhCl</b> | Adbippypfos                                                                                                                 | 100          | 1           | 99           | 33                        | 1871             | 6    |
|                                     | <b>Our work</b>                                                                                                             | <b>100</b>   | <b>1</b>    | <b>99</b>    | <b>33</b>                 | <b>37</b>        |      |

**Table S5. The predicted P-ligands for PhCl activation via MPCD-based ALS and their reported catalytic performance in literature for Pd-catalyzed cross-coupling reaction.**

|    | name                         | G1           | G2       | G3       | $\Delta E_{rep}(L)$<br>(kJ/mol) | Vbur<br>(%) | Price<br>(CNY/g) | Yield<br>(%) <sup>a</sup> |
|----|------------------------------|--------------|----------|----------|---------------------------------|-------------|------------------|---------------------------|
| 1  | P_Ph_p_OMePh_p_OMePh         | Ph           | p_OMePh  | p_OMePh  | 16.4                            | 30.2        | 103              | 0                         |
| 2  | P_Cy_Cy_2MeBPh               | 2MeBPh       | Cy       | Cy       | 18.3                            | 43.0        | 28               | 32                        |
| 3  | P_Ph_Ph_o_Tol                | o_Tol        | Ph       | Ph       | 18.3                            | 30.7        | 83               | 0                         |
| 4  | P_Ph_Ph_o_OMePh              | o_OMePh      | Ph       | Ph       | 18.3                            | 31.4        | 286              | 0                         |
| 5  | P_t_Bu_t_Bu_BOMeBPh          | t_Bu         | BOMeBPh  | t_Bu     | 18.3                            | 51.4        | 7190             |                           |
| 6  | P_Ph_Ph_4NMe2Ph              | 4NMe2Ph      | Ph       | Ph       | 19.3                            | 29.4        | 20               | 0                         |
| 7  | P_Ph_Ph_oPhOH                | oPhOH        | Ph       | Ph       | 20.3                            | 31.9        | 359              | 0                         |
| 8  | P_Ph_o_OMePh_o_OMePh         | Ph           | o_OMePh  | o_OMePh  | 20.3                            | 32.5        | 123              | 1                         |
| 9  | P_22MeNBPh_Ph_Ph             | 22MeNBPh     | Ph       | Ph       | 20.3                            | 35.9        | 35               | 26                        |
| 10 | P_Mes_Mes_Cyp                | Mes          | Cyp      | Mes      | 24.1                            | 41.4        |                  |                           |
| 11 | P_Ph_Ph_BOMeBPh              | Ph           | BOMeBPh  | Ph       | 26.1                            | 40.3        | 46               | 74                        |
| 12 | P_Ph_Ph_TiPrBPh              | TiPrBPh      | Ph       | Ph       | 28.0                            | 45.2        | 37               | 97                        |
| 13 | P_o_OMePh_o_OMePh_o_OMePh    | o_OMePh      | o_OMePh  | o_OMePh  | 28.0                            | 34.1        | 21               | 24                        |
| 14 | P_TOMeBPh_Cy_Cy              | TOMeBPh      | Cy       | Cy       | 28.9                            | 40.4        | 1711             | 47                        |
| 15 | P_Ph_Ph_2MeBPh               | Ph           | 2MeBPh   | Ph       | 29.9                            | 37.5        | 53               | 21                        |
| 16 | P_t_Bu_t_Bu_1PhPyr           | 1PhPyr       | t_Bu     | t_Bu     | 29.9                            | 43.3        | 1450             | 99                        |
| 17 | P_Cy_Cy_TPhBPyz              | TPhBPyz      | Cy       | Cy       | 29.9                            | 36.1        | 1141             | 95                        |
| 18 | P_t_Bu_t_Bu_36OMe2TRIPPh     | 36OMe2TRIPPh | t_Bu     | t_Bu     | 31.8                            | 44.0        | 258              | 7                         |
| 19 | P_26BOMePh_26BOMePh_26BOMePh | 26BOMePh     | 26BOMePh | 26BOMePh | 34.7                            | 39.0        | 23               | 1                         |

<sup>a</sup> Reaction VII in manuscript.

**Table S6. The reaction yields for the representative catalytic system in the literature for the Suzuki coupling of ArCl with *o*-tolylboronic acid.**

| ArCl                              | Ligand                                                 | Temp (°C) | Time (h) | Yield (%) | Ref.          |
|-----------------------------------|--------------------------------------------------------|-----------|----------|-----------|---------------|
| <i>p</i> -NH <sub>2</sub> -PhCl   | Ph-XPhos                                               | 100       | 2        | 40        | This work     |
|                                   | NHC                                                    | 50        | 24       | 89        | <sup>7</sup>  |
| <i>p</i> -NO <sub>2</sub> -PhCl   | Ph-XPhos                                               | 100       | 3        | 90        | This work     |
|                                   | N-ligand                                               | 85        | 5.5      | 68        | <sup>8</sup>  |
| <i>p</i> -OH-PhCl                 | Ph-XPhos                                               | 100       | 2        | 50        | This work     |
|                                   | polymeric imidazole Pd                                 | 100       | 12       | 90        | <sup>9</sup>  |
| <i>p</i> -CH <sub>3</sub> O-PhCl  | Ph-XPhos                                               | 100       | 2        | 72        | This work     |
|                                   | NHC                                                    | 80        | 6        | 99        | <sup>10</sup> |
|                                   | NHC                                                    | 80        | 4        | 99        | <sup>11</sup> |
| <i>p</i> -CH <sub>3</sub> CO-PhCl | Ph-XPhos                                               | 100       | 2        | 69        | This work     |
|                                   | ( <i>t</i> -Bu-Ph-phosphinomethyl)polystyrene          |           | 20       | 86        | <sup>12</sup> |
| <i>o</i> -CF <sub>3</sub> -PhCl   | Ph-XPhos                                               | 100       | 1        | 99        | This work     |
|                                   | NHC                                                    | 130       | 27       | 71        | <sup>5</sup>  |
| <i>m</i> -CF <sub>3</sub> -PhCl   | Ph-XPhos                                               | 100       | 1        | 99        | This work     |
|                                   | Ferrocene-based phosphine<br>(with phenylboronic acid) | r.t.      | 12       | 99        | <sup>13</sup> |
|                                   | P[OiPr] <sub>3</sub> (phenylboronic acid)              | 120       | 18       | 88        | <sup>14</sup> |

**Table S7. The calculated  $\Delta E_{rep}(L)$  results by using PBE functional in VASP and B3LYP functional in Gaussian 09 packages and their absolute energy differences ( $|E_{diff}|$ ). The unit of energy is kJ/mol.**

| Name                            | $\Delta E_{rep}(L)$ | $\Delta E_{rep}(L)$   | $ E_{diff} $ |
|---------------------------------|---------------------|-----------------------|--------------|
|                                 | with PBE functional | with B3LYP functional |              |
| P_Cyp_35BTRIPPh_35BTRIPPh       | 1.9                 | 0.0                   | 1.9          |
| P_35Bt_BuPh_35Bt_BuPh_35BTRIPPh | 3.9                 | 1.9                   | 1.9          |
| P_Cyp_35BMesPh_35BMesPh         | 0.0                 | 1.9                   | 1.9          |
| P_TPhBPyz_Adm_Adm               | 12.5                | 12.5                  | 0.0          |
| P_Cy_Cy_35BTRIPPh               | -3.9                | -1.9                  | 1.9          |
| P_Cyp_Cyp_35BTRIPPh             | -1.9                | 1.0                   | 2.9          |
| P_35Bt_BuPh_35Bt_BuPh_35Bt_BuPh | 7.7                 | 3.9                   | 3.9          |
| P_Cy_Cy_TPhBPyz                 | -40.5               | -28.0                 | 12.5         |
| P_36OMe2TRIPPh_Cy_Cy            | -5.8                | -7.7                  | 1.9          |
| P_t_Bu_t_Bu_TPhBPyz             | 16.4                | 20.3                  | 3.9          |
| P_26BOMePh_26BOMePh_26BOMePh    | 34.7                | 30.9                  | 3.9          |
| P_t_Bu_t_Bu_36OMe2TRIPPh        | 17.4                | 32.8                  | 15.4         |
| P_Cy_35Bt_BuPh_35Bt_BuPh        | -1.9                | -1.0                  | 1.0          |
| P_Ph_35Bt_BuPh_35Bt_BuPh        | 5.8                 | 6.8                   | 1.0          |
| P_Cy_Cy_BOiPrBPh                | 4.8                 | 6.8                   | 1.9          |
| P_Cyp_35Bt_BuPh_35Bt_BuPh       | -1.0                | 1.0                   | 1.9          |
| P_TiPrBPh_Cy_Cy                 | 3.9                 | 5.8                   | 1.9          |
| P_Ph_Ph_TiPrBPh                 | 28.0                | 19.3                  | 8.7          |
| P_TOMeBPh_Cy_Cy                 | 28.9                | 18.3                  | 10.6         |
| P_n_Bu_35Bt_BuPh_35Bt_BuPh      | 2.9                 | 3.9                   | 1.0          |
| P_t_Bu_35Bt_BuPh_35Bt_BuPh      | 5.8                 | 6.8                   | 1.0          |
| P_35BPhPyzPh_t_Bu_t_Bu          | 3.9                 | 6.8                   | 2.9          |
| P_BOMeBPh_o_Tol_o_Tol           | 21.2                | 24.1                  | 2.9          |
| P_Cy_Cy_26B2MeNBPh              | 9.6                 | 13.5                  | 3.9          |
| P_Adm_Adm_Adm                   | -2.9                | 1.0                   | 3.9          |
| P_Cy_Cy_BOMeBPh                 | 13.5                | 11.6                  | 1.9          |
| P_Ph_Ph_BOMeBPh                 | 26.1                | 16.4                  | 9.6          |
| P_o_OMePh_o_OMePh_26BOMePh      | 1.0                 | 0.0                   | 1.0          |
| P_t_Bu_t_Bu_TiPrBPh             | 14.5                | 10.6                  | 3.9          |
| P_t_Bu_t_Bu_BNap                | 12.5                | 19.3                  | 6.8          |
| P_22MeNBPh_Cy_Cy                | 0.0                 | -1.0                  | 1.0          |
| P_Cy_Cy_1PhIn                   | 5.8                 | 3.9                   | 1.9          |
| P_22MeNBPh_Ph_Ph                | 20.3                | 24.1                  | 3.9          |
| P_Adm_Bn_Adm                    | 2.9                 | 1.9                   | 1.0          |
| P_Mes_Mes_Mes                   | 35.7                | 39.6                  | 3.9          |
| P_Ph_Ph_Trop                    | 5.8                 | 0.0                   | 5.8          |
| P_p_OMePh_p_OMePh_p_OMePh       | 10.6                | 2.9                   | 7.7          |
| P_o_OMePh_o_OMePh_o_OMePh       | 28.0                | 24.1                  | 3.9          |
| P_Cy_Cy_2OMe1PhPyr              | 8.7                 | 5.8                   | 2.9          |
| P_Cy_Cy_2MeBPh                  | 18.3                | 13.5                  | 4.8          |

---

|                            |       |       |      |
|----------------------------|-------|-------|------|
| P_t_Bu_r5_r5               | 13.5  | 11.6  | 1.9  |
| P_n_Bu_Adm_Adm             | -8.7  | -6.8  | 1.9  |
| P_t_Bu_Adm_Adm             | 10.6  | 16.4  | 5.8  |
| P_Cy_p_OMePh_p_OMePh       | 3.9   | 4.8   | 1.0  |
| P_t_Bu_t_Bu_NapPyr         | 29.9  | 32.8  | 2.9  |
| P_PrO2Me_PrO2Me_PrO2Me     | -7.7  | -10.6 | 2.9  |
| P_OPh_OPh_OPh              | 5.8   | 1.9   | 3.9  |
| P_t_Bu_t_Bu_22MeNBPh       | 5.8   | 11.6  | 5.8  |
| P_3OMe6Me2TRIPPh_t_Bu_t_Bu | 9.6   | 13.5  | 3.9  |
| P_Cy_Cy_1PhPyr             | -6.8  | 7.7   | 14.5 |
| P_t_Bu_t_Bu_1PhIn          | 10.6  | 12.5  | 1.9  |
| P_Mes_Mes_Cyp              | 24.1  | 21.2  | 2.9  |
| P_Cyp_p_OMePh_p_OMePh      | -1.0  | 0.0   | 1.0  |
| P_t_Bu_t_Bu_2OMe1PhPyr     | 6.8   | 10.6  | 3.9  |
| P_Cy_Cy_4NMe2Ph            | 1.9   | -6.8  | 8.7  |
| P_BEtN_OBn_OBn             | 1.0   | 2.9   | 1.9  |
| P_Cy_Cy_Mes                | 12.5  | 20.3  | 7.7  |
| P_t_Bu_t_Bu_2MeBPh         | 15.4  | 20.3  | 4.8  |
| P_Cyp_35BMePh_35BMePh      | 0.0   | 1.0   | 1.0  |
| P_p_Tol_p_Tol_p_Tol        | 8.7   | 5.8   | 2.9  |
| P_m_Tol_m_Tol_m_Tol        | 13.5  | 5.8   | 7.7  |
| P_o_Tol_o_Tol_o_Tol        | 7.7   | 14.5  | 6.8  |
| P_Bn_Bn_Bn                 | 2.9   | 5.8   | 2.9  |
| P_t_Bu_t_Bu_BPh            | 15.4  | 13.5  | 1.9  |
| P_Cy_o_Tol_o_Tol           | -18.3 | -10.6 | 7.7  |
| P_t_Bu_t_Bu_1PhPyr         | 29.9  | 32.8  | 2.9  |
| P_Cy_Cy_o_Tol              | 1.9   | 5.8   | 3.9  |
| P_Mes_Cyp_Cyp              | 11.6  | 21.2  | 9.6  |
| P_Ph_Ph_p_Tol              | 14.5  | 8.7   | 5.8  |
| P_Ph_Ph_o_Tol              | 4.8   | 5.8   | 1.0  |
| P_Ph_Ph_Bn                 | 2.9   | 4.8   | 1.9  |
| P_Cy_Cy_Cy                 | -28.0 | -24.1 | 3.9  |
| P_t_Bu_t_Bu_Adm            | -1.9  | 1.9   | 3.9  |
| P_Cy_Cy_Ph                 | -1.9  | -1.0  | 1.0  |
| P_iPr_BPh_iPr              | -2.9  | -1.9  | 1.0  |
| P_Cy_Ph_Ph                 | 2.9   | 2.9   | 0.0  |
| P_Ph_Ph_Ph                 | 13.5  | 7.7   | 5.8  |
| P_Ph_Ph_Cyp                | 11.6  | 5.8   | 5.8  |
| P_BEtN_BEtN_BEtN           | -1.9  | 0.0   | 1.9  |
| P_Cy_Cy_t_Bu               | -4.8  | -3.9  | 1.0  |
| P_t_Bu_OtBu_OtBu           | -5.8  | -1.0  | 4.8  |
| P_Ph_Cyp_Cyp               | 0.0   | -1.0  | 1.0  |
| P_Ph_Ph_t_Bu               | 10.6  | 4.8   | 5.8  |
| P_Ph_Ph_OEt                | 1.9   | -5.8  | 7.7  |

---

|                     |       |       |      |
|---------------------|-------|-------|------|
| P_Cyp_Cyp_Cyp       | -3.9  | -1.0  | 2.9  |
| P_t_Bu_t_Bu_Bn      | 1.0   | 2.9   | 1.9  |
| P_iPr_Ph_Ph         | 4.8   | 3.9   | 1.0  |
| P_Prol_Prol_Prol    | 3.9   | 11.6  | 7.7  |
| P_Ph_Ph_Aly         | 1.0   | 1.9   | 1.0  |
| P_Cy_t_Bu_t_Bu      | -1.9  | 0.0   | 1.9  |
| P_Ph_t_Bu_t_Bu      | 5.8   | 2.9   | 2.9  |
| P_Me_BPh_Me         | 4.8   | 5.8   | 1.0  |
| P_EtCN_EtCN_EtCN    | -6.8  | -2.9  | 3.9  |
| P_n_Bu_n_Bu_n_Bu    | -23.2 | -24.1 | 1.0  |
| P_i_Bu_i_Bu_i_Bu    | -1.0  | 8.7   | 9.6  |
| P_t_Bu_t_Bu_n_Bu    | -3.9  | -2.9  | 1.0  |
| P_t_Bu_t_Bu_t_Bu    | -3.9  | 0.0   | 3.9  |
| P_OEt_OEt_OEt       | -10.6 | -23.2 | 12.5 |
| P_iPr_t_Bu_t_Bu     | -17.4 | -14.5 | 2.9  |
| P_BMeN_BMeN_BMeN    | 15.4  | 16.4  | 1.0  |
| P_n_Pr_n_Pr_n_Pr    | -2.9  | -1.9  | 1.0  |
| P_iPr_iPr_iPr       | -2.9  | -1.9  | 1.0  |
| P_Me_t_Bu_t_Bu      | 1.0   | 1.0   | 0.0  |
| P_Aly_Aly_Aly       | -5.8  | -3.9  | 1.9  |
| P_Et_Et_Et          | -7.7  | -6.8  | 1.0  |
| P_Me_Me_Me          | 0.0   | 0.0   | 0.0  |
| Mean absolute error |       |       | 3.7  |

---

---

## References

1. Baillie, C., Zhang, L.X. & Xiao, J.L. Ferrocenyl monophosphine ligands: Synthesis and applications in the Suzuki-Miyaura coupling of aryl chlorides. *J. Org. Chem.* **69**, 7779-7782 (2004).
2. Ullah, E., McNulty, J. & Robertson, A. A novel P,O-type phosphorinane ligand for the Suzuki-Miyaura cross-coupling of aryl chlorides. *Tetrahedron Lett.* **50**, 5599-5601 (2009).
3. Mao, S.L. *et al.* A highly active catalytic system for Suzuki-Miyaura cross-coupling reactions of aryl and heteroaryl chlorides in water. *Org. Biomol. Chem.* **10**, 9410-9417 (2012).
4. Keles, M. & Yilmaz, M.K. Synthesis, characterization and catalytic activity of new aminomethyldiphosphine-Pd(II) complexes for Suzuki cross-coupling reaction. *Appl. Org. Chem.* **28**, 91-94 (2014).
5. Rosa, G.R., Ebeling, G., Dupont, J. & Monteiro, A.L. A superior non-symmetrical NCP pincer type palladacycle catalyst precursor for the coupling of aryl boronic acids with aryl chlorides. *Synthesis*, 2894-2897 (2003).
6. Newman-Stonebraker, S.H. *et al.* Univariate classification of phosphine ligation state and reactivity in cross-coupling catalysis. *Science* **374**, 301-308 (2021).
7. Song, C. *et al.* Palladium catalyzed Suzuki-Miyaura coupling with aryl chlorides using a bulky phenanthryl-heterocyclic carbene ligand. *Tetrahedron* **61**, 7438-7446 (2005).
8. Song, J.Y. *et al.* Efficient symmetrical bidentate dioxime ligand-accelerated homogeneous palladium-catalyzed Suzuki-Miyaura coupling reactions of aryl chlorides. *New J. Chem.* **41**, 372-376 (2017).
9. Yamada, Y.M.A., Sarkar, S.M. & Uozumi, Y. Self-Assembled Poly(imidazole-palladium): Highly Active, Reusable Catalyst at Parts per Million to Parts per Billion Levels. *J. Am. Chem. Soc.* **134**, 3190-3198 (2012).
10. Wang, T. *et al.* Synthesis and characterization of trinuclear N-heterocyclic carbene-palladium(II) complexes and their applications in the Suzuki-Miyaura cross-coupling reaction. *RSC Adv.* **6**, 100690-100695 (2016).
11. Wang, T., Xu, K., Wang, W.L., Zhang, A.A. & Liu, L.T. Dinuclear NHC-palladium(II) complexes: synthesis, characterization and application to Suzuki-Miyaura cross-coupling reactions. *Transit. Met. Chem.* **43**, 347-353 (2018).
12. Schweizer, S., Becht, J.M. & Le Drian, C. Highly efficient reusable polymer-supported Pd catalysts of general use for the Suzuki reaction. *Tetrahedron* **66**, 765-772 (2010).
13. Yu, S.B. *et al.* Ferrocene-based phosphine-triazine ligands for highly efficient Suzuki-Miyaura cross-coupling reaction of aryl chlorides. *Tetrahedron Lett.* **49**, 1253-1256 (2008).
14. Zapf, A. & Beller, M. Palladium/phosphite catalyst systems for efficient cross coupling of aryl bromides and chlorides with phenylboronic acid. *Chem. - Eur. J.* **6**, 1830-1833 (2000).
